# Supplementary material for: Interferon regulatory factor 3 is a key regulation factor for inducing the expression of SAMHD1 in antiviral innate immunity
Source: PubMed Central journal article supplement (PMC4944147; doi:10.1038/srep29665), 2016-07-14

**Interferon regulatory factor 3 is a key regulation factor for inducing  
the expression of SAMHD1 in antiviral innate immunity**

Shen Yang, Yuan Zhan, Yanjun Zhou, Yifeng Jiang, Xuchen Zheng, Lingxue Yu, Wu  
Tong, Fei Gao, Liwei Li, Qinfeng Huang, Zhiyong Ma , Guangzhi Tong\*

*Shanghai Veterinary Research Institute, Chinese Academy of Agricultural Sciences,  
Shanghai, 200241, PR China*

Figure 1B

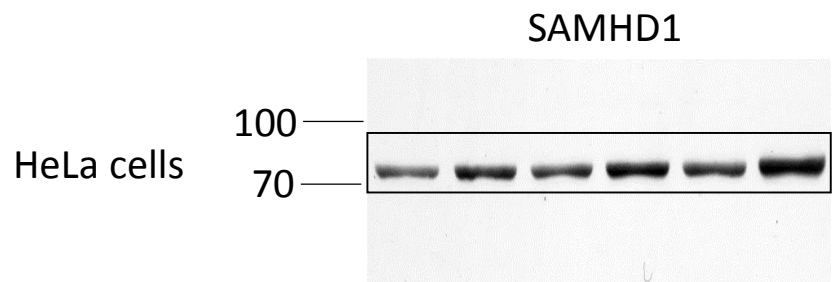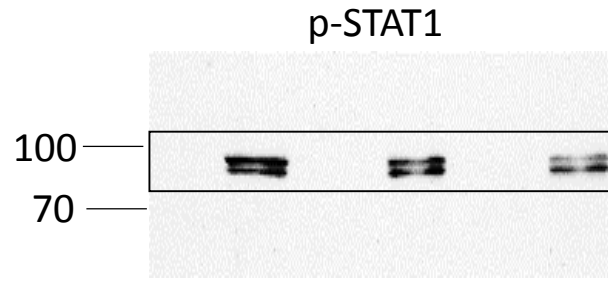

Figure 1D

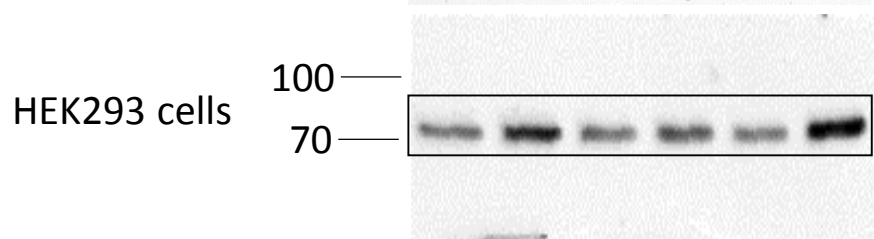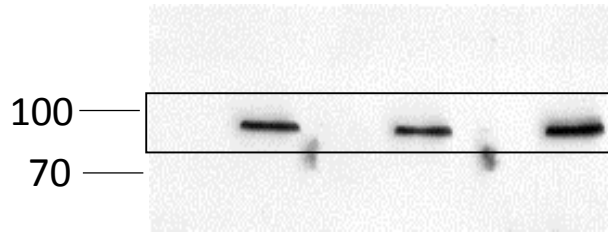

Figure 1F

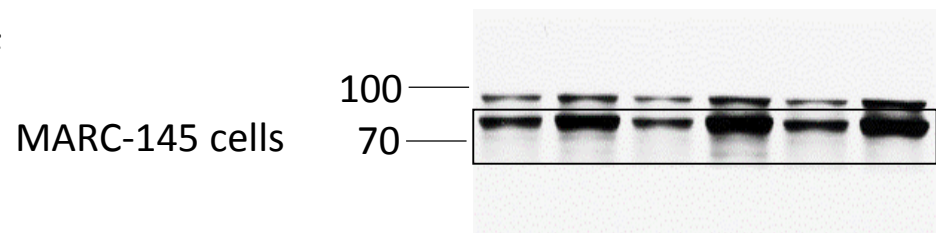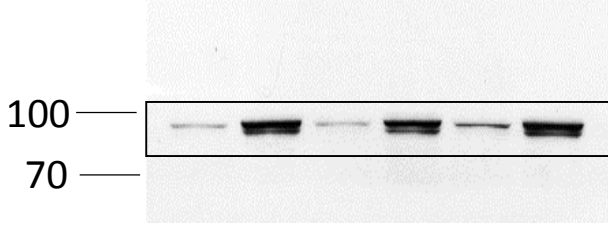

Figure 1H

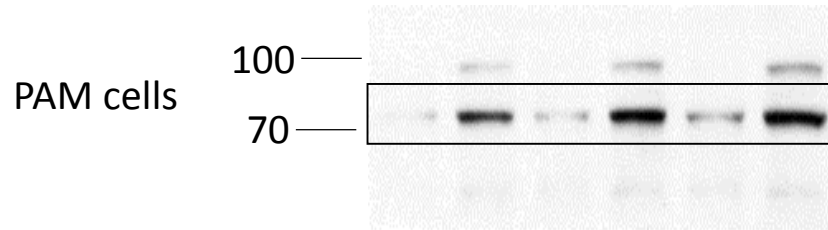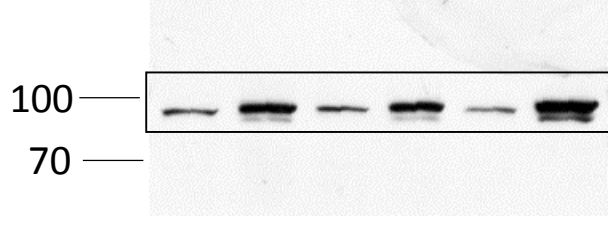

Figure 1I

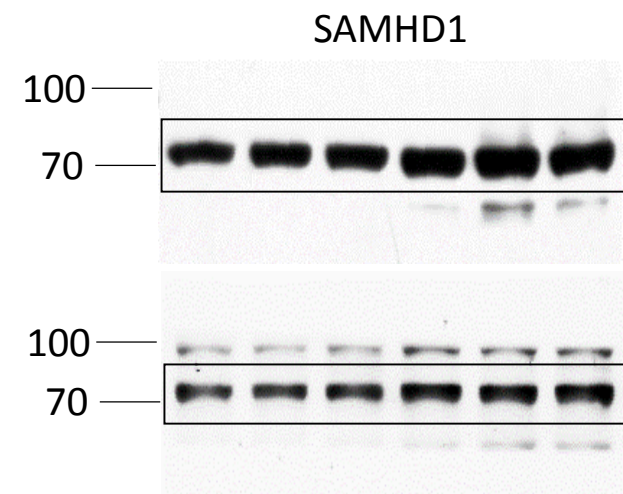

Supplement: srep29665-s3.pdf [file srep29665-s3.pdf]
